# Supplementary material for: Relating 27-day Averages of Solar, Interplanetary Medium Parameters and Geomagnetic Activity Proxies in Solar Cycle 24
Source: Research Square preprint supplement (doi:10.21203/rs.3.rs-224356/v1), 2021-03-06
Supplement: Supplementary file 1 [file a87d430fef87c6aeca5f2377.csv]

+	2009	1	1
+	2009	1	2
+	2009	1	3
+	2009	1	4
+	2009	1	5
+	2009	1	6
+	2009	1	7
+	2009	1	8
-	2009	1	9
-	2009	1	10
-	2009	1	11
-	2009	1	12
-	2009	1	13
-	2009	1	14
NaN	2009	1	15
-	2009	1	16
-	2009	1	17
-	2009	1	18
-	2009	1	19
-	2009	1	20
-	2009	1	21
-	2009	1	22
+	2009	1	23
+	2009	1	24
+	2009	1	25
+	2009	1	26
+	2009	1	27
+	2009	1	28
+	2009	1	29
+	2009	1	30
+	2009	1	31
+	2009	1	32
+	2009	1	33
NaN	2009	1	34
-	2009	1	35
-	2009	1	36
-	2009	1	37
-	2009	1	38
-	2009	1	39
-	2009	1	40
-	2009	1	41
+	2009	1	42
+	2009	1	43
+	2009	1	44
-	2009	1	45
-	2009	1	46
-	2009	1	47
-	2009	1	48
-	2009	1	49
-	2009	1	50
+	2009	1	51
+	2009	1	52
+	2009	1	53
+	2009	1	54
+	2009	1	55
+	2009	1	56
+	2009	1	57
+	2009	1	58
+	2009	1	59
+	2009	1	60
+	2009	1	61
+	2009	1	62
+	2009	1	63
+	2009	1	64
+	2009	1	65
+	2009	1	66
+	2009	1	67
+	2009	1	68
-	2009	1	69
-	2009	1	70
-	2009	1	71
-	2009	1	72
-	2009	1	73
-	2009	1	74
-	2009	1	75
-	2009	1	76
-	2009	1	77
+	2009	1	78
+	2009	1	79
+	2009	1	80
+	2009	1	81
+	2009	1	82
+	2009	1	83
+	2009	1	84
+	2009	1	85
+	2009	1	86
+	2009	1	87
+	2009	1	88
+	2009	1	89
+	2009	1	90
+	2009	1	91
+	2009	1	92
+	2009	1	93
NaN	2009	1	94
+	2009	1	95
+	2009	1	96
-	2009	1	97
-	2009	1	98
-	2009	1	99
-	2009	1	100
-	2009	1	101
-	2009	1	102
-	2009	1	103
-	2009	1	104
-	2009	1	105
-	2009	1	106
+	2009	1	107
+	2009	1	108
+	2009	1	109
+	2009	1	110
+	2009	1	111
+	2009	1	112
+	2009	1	113
+	2009	1	114
+	2009	1	115
+	2009	1	116
+	2009	1	117
+	2009	1	118
+	2009	1	119
+	2009	1	120
+	2009	1	121
+	2009	1	122
+	2009	1	123
+	2009	1	124
+	2009	1	125
-	2009	1	126
-	2009	1	127
-	2009	1	128
-	2009	1	129
-	2009	1	130
-	2009	1	131
-	2009	1	132
-	2009	1	133
+	2009	1	134
+	2009	1	135
+	2009	1	136
+	2009	1	137
+	2009	1	138
NaN	2009	1	139
+	2009	1	140
+	2009	1	141
+	2009	1	142
+	2009	1	143
+	2009	1	144
+	2009	1	145
+	2009	1	146
-	2009	1	147
-	2009	1	148
-	2009	1	149
-	2009	1	150
-	2009	1	151
NaN	2009	1	152
NaN	2009	1	153
-	2009	1	154
-	2009	1	155
-	2009	1	156
-	2009	1	157
-	2009	1	158
-	2009	1	159
-	2009	1	160
+	2009	1	161
+	2009	1	162
+	2009	1	163
+	2009	1	164
+	2009	1	165
+	2009	1	166
+	2009	1	167
+	2009	1	168
+	2009	1	169
+	2009	1	170
+	2009	1	171
-	2009	1	172
-	2009	1	173
-	2009	1	174
-	2009	1	175
-	2009	1	176
-	2009	1	177
-	2009	1	178
-	2009	1	179
-	2009	1	180
-	2009	1	181
-	2009	1	182
-	2009	1	183
-	2009	1	184
-	2009	1	185
-	2009	1	186
-	2009	1	187
-	2009	1	188
NaN	2009	1	189
-	2009	1	190
-	2009	1	191
-	2009	1	192
-	2009	1	193
+	2009	1	194
+	2009	1	195
+	2009	1	196
+	2009	1	197
+	2009	1	198
+	2009	1	199
+	2009	1	200
NaN	2009	1	201
-	2009	1	202
-	2009	1	203
-	2009	1	204
-	2009	1	205
-	2009	1	206
-	2009	1	207
-	2009	1	208
-	2009	1	209
-	2009	1	210
-	2009	1	211
-	2009	1	212
-	2009	1	213
-	2009	1	214
-	2009	1	215
NaN	2009	1	216
-	2009	1	217
-	2009	1	218
-	2009	1	219
-	2009	1	220
-	2009	1	221
-	2009	1	222
+	2009	1	223
+	2009	1	224
+	2009	1	225
+	2009	1	226
+	2009	1	227
+	2009	1	228
-	2009	1	229
-	2009	1	230
-	2009	1	231
-	2009	1	232
-	2009	1	233
-	2009	1	234
-	2009	1	235
-	2009	1	236
-	2009	1	237
-	2009	1	238
-	2009	1	239
-	2009	1	240
-	2009	1	241
-	2009	1	242
-	2009	1	243
-	2009	1	244
-	2009	1	245
-	2009	1	246
-	2009	1	247
-	2009	1	248
-	2009	1	249
-	2009	1	250
-	2009	1	251
-	2009	1	252
-	2009	1	253
NaN	2009	1	254
NaN	2009	1	255
-	2009	1	256
-	2009	1	257
-	2009	1	258
-	2009	1	259
-	2009	1	260
-	2009	1	261
-	2009	1	262
-	2009	1	263
-	2009	1	264
-	2009	1	265
-	2009	1	266
-	2009	1	267
-	2009	1	268
-	2009	1	269
NaN	2009	1	270
NaN	2009	1	271
-	2009	1	272
-	2009	1	273
-	2009	1	274
-	2009	1	275
-	2009	1	276
-	2009	1	277
-	2009	1	278
-	2009	1	279
-	2009	1	280
-	2009	1	281
NaN	2009	1	282
NaN	2009	1	283
-	2009	1	284
-	2009	1	285
-	2009	1	286
-	2009	1	287
-	2009	1	288
-	2009	1	289
-	2009	1	290
-	2009	1	291
-	2009	1	292
-	2009	1	293
-	2009	1	294
-	2009	1	295
-	2009	1	296
+	2009	1	297
+	2009	1	298
+	2009	1	299
+	2009	1	300
+	2009	1	301
+	2009	1	302
+	2009	1	303
+	2009	1	304
-	2009	1	305
-	2009	1	306
-	2009	1	307
-	2009	1	308
-	2009	1	309
-	2009	1	310
-	2009	1	311
-	2009	1	312
-	2009	1	313
-	2009	1	314
-	2009	1	315
-	2009	1	316
-	2009	1	317
-	2009	1	318
-	2009	1	319
-	2009	1	320
-	2009	1	321
-	2009	1	322
NaN	2009	1	323
-	2009	1	324
-	2009	1	325
-	2009	1	326
-	2009	1	327
NaN	2009	1	328
+	2009	1	329
+	2009	1	330
+	2009	1	331
+	2009	1	332
+	2009	1	333
+	2009	1	334
+	2009	1	335
+	2009	1	336
+	2009	1	337
+	2009	1	338
-	2009	1	339
-	2009	1	340
-	2009	1	341
-	2009	1	342
-	2009	1	343
-	2009	1	344
-	2009	1	345
-	2009	1	346
-	2009	1	347
-	2009	1	348
-	2009	1	349
-	2009	1	350
-	2009	1	351
-	2009	1	352
-	2009	1	353
-	2009	1	354
-	2009	1	355
+	2009	1	356
+	2009	1	357
+	2009	1	358
+	2009	1	359
+	2009	1	360
+	2009	1	361
+	2009	1	362
+	2009	1	363
+	2009	1	364
+	2009	1	365
+	2010	1	1
+	2010	1	2
+	2010	1	3
+	2010	1	4
+	2010	1	5
-	2010	1	6
-	2010	1	7
-	2010	1	8
-	2010	1	9
-	2010	1	10
-	2010	1	11
-	2010	1	12
-	2010	1	13
-	2010	1	14
-	2010	1	15
-	2010	1	16
-	2010	1	17
+	2010	1	18
+	2010	1	19
+	2010	1	20
+	2010	1	21
+	2010	1	22
+	2010	1	23
+	2010	1	24
+	2010	1	25
+	2010	1	26
+	2010	1	27
+	2010	1	28
+	2010	1	29
+	2010	1	30
-	2010	1	31
-	2010	1	32
-	2010	1	33
-	2010	1	34
-	2010	1	35
-	2010	1	36
-	2010	1	37
-	2010	1	38
-	2010	1	39
-	2010	1	40
-	2010	1	41
-	2010	1	42
-	2010	1	43
-	2010	1	44
-	2010	1	45
-	2010	1	46
+	2010	1	47
+	2010	1	48
+	2010	1	49
+	2010	1	50
+	2010	1	51
+	2010	1	52
+	2010	1	53
+	2010	1	54
+	2010	1	55
+	2010	1	56
+	2010	1	57
+	2010	1	58
+	2010	1	59
-	2010	1	60
-	2010	1	61
-	2010	1	62
-	2010	1	63
-	2010	1	64
-	2010	1	65
-	2010	1	66
-	2010	1	67
-	2010	1	68
-	2010	1	69
-	2010	1	70
-	2010	1	71
-	2010	1	72
-	2010	1	73
+	2010	1	74
+	2010	1	75
+	2010	1	76
+	2010	1	77
+	2010	1	78
+	2010	1	79
+	2010	1	80
+	2010	1	81
+	2010	1	82
+	2010	1	83
+	2010	1	84
+	2010	1	85
+	2010	1	86
+	2010	1	87
+	2010	1	88
-	2010	1	89
-	2010	1	90
-	2010	1	91
-	2010	1	92
-	2010	1	93
-	2010	1	94
-	2010	1	95
-	2010	1	96
-	2010	1	97
-	2010	1	98
-	2010	1	99
-	2010	1	100
-	2010	1	101
-	2010	1	102
+	2010	1	103
+	2010	1	104
+	2010	1	105
+	2010	1	106
+	2010	1	107
+	2010	1	108
+	2010	1	109
NaN	2010	1	110
NaN	2010	1	111
+	2010	1	112
+	2010	1	113
+	2010	1	114
+	2010	1	115
+	2010	1	116
+	2010	1	117
NaN	2010	1	118
-	2010	1	119
-	2010	1	120
-	2010	1	121
-	2010	1	122
-	2010	1	123
-	2010	1	124
-	2010	1	125
-	2010	1	126
-	2010	1	127
-	2010	1	128
-	2010	1	129
-	2010	1	130
+	2010	1	131
+	2010	1	132
+	2010	1	133
+	2010	1	134
+	2010	1	135
+	2010	1	136
+	2010	1	137
NaN	2010	1	138
+	2010	1	139
+	2010	1	140
+	2010	1	141
+	2010	1	142
+	2010	1	143
+	2010	1	144
+	2010	1	145
-	2010	1	146
-	2010	1	147
-	2010	1	148
-	2010	1	149
-	2010	1	150
-	2010	1	151
-	2010	1	152
-	2010	1	153
-	2010	1	154
-	2010	1	155
-	2010	1	156
-	2010	1	157
+	2010	1	158
+	2010	1	159
+	2010	1	160
+	2010	1	161
+	2010	1	162
+	2010	1	163
+	2010	1	164
NaN	2010	1	165
+	2010	1	166
+	2010	1	167
+	2010	1	168
+	2010	1	169
+	2010	1	170
+	2010	1	171
+	2010	1	172
+	2010	1	173
+	2010	1	174
+	2010	1	175
-	2010	1	176
-	2010	1	177
-	2010	1	178
-	2010	1	179
-	2010	1	180
-	2010	1	181
-	2010	1	182
-	2010	1	183
-	2010	1	184
-	2010	1	185
-	2010	1	186
-	2010	1	187
-	2010	1	188
-	2010	1	189
-	2010	1	190
+	2010	1	191
+	2010	1	192
NaN	2010	1	193
NaN	2010	1	194
+	2010	1	195
+	2010	1	196
+	2010	1	197
+	2010	1	198
+	2010	1	199
NaN	2010	1	200
NaN	2010	1	201
+	2010	1	202
+	2010	1	203
-	2010	1	204
-	2010	1	205
-	2010	1	206
-	2010	1	207
-	2010	1	208
-	2010	1	209
-	2010	1	210
-	2010	1	211
-	2010	1	212
-	2010	1	213
-	2010	1	214
-	2010	1	215
-	2010	1	216
-	2010	1	217
-	2010	1	218
-	2010	1	219
-	2010	1	220
-	2010	1	221
+	2010	1	222
+	2010	1	223
+	2010	1	224
+	2010	1	225
NaN	2010	1	226
+	2010	1	227
+	2010	1	228
+	2010	1	229
+	2010	1	230
+	2010	1	231
+	2010	1	232
-	2010	1	233
-	2010	1	234
-	2010	1	235
-	2010	1	236
-	2010	1	237
-	2010	1	238
-	2010	1	239
-	2010	1	240
-	2010	1	241
-	2010	1	242
-	2010	1	243
-	2010	1	244
-	2010	1	245
-	2010	1	246
-	2010	1	247
-	2010	1	248
-	2010	1	249
NaN	2010	1	250
NaN	2010	1	251
-	2010	1	252
-	2010	1	253
-	2010	1	254
-	2010	1	255
-	2010	1	256
NaN	2010	1	257
-	2010	1	258
-	2010	1	259
-	2010	1	260
-	2010	1	261
-	2010	1	262
NaN	2010	1	263
-	2010	1	264
-	2010	1	265
-	2010	1	266
-	2010	1	267
-	2010	1	268
-	2010	1	269
-	2010	1	270
-	2010	1	271
-	2010	1	272
-	2010	1	273
-	2010	1	274
-	2010	1	275
-	2010	1	276
-	2010	1	277
+	2010	1	278
+	2010	1	279
+	2010	1	280
NaN	2010	1	281
NaN	2010	1	282
NaN	2010	1	283
+	2010	1	284
+	2010	1	285
+	2010	1	286
NaN	2010	1	287
NaN	2010	1	288
+	2010	1	289
+	2010	1	290
+	2010	1	291
-	2010	1	292
-	2010	1	293
-	2010	1	294
-	2010	1	295
-	2010	1	296
-	2010	1	297
-	2010	1	298
-	2010	1	299
-	2010	1	300
-	2010	1	301
-	2010	1	302
-	2010	1	303
-	2010	1	304
-	2010	1	305
NaN	2010	1	306
NaN	2010	1	307
-	2010	1	308
-	2010	1	309
-	2010	1	310
-	2010	1	311
+	2010	1	312
+	2010	1	313
+	2010	1	314
+	2010	1	315
+	2010	1	316
-	2010	1	317
-	2010	1	318
-	2010	1	319
-	2010	1	320
-	2010	1	321
-	2010	1	322
-	2010	1	323
-	2010	1	324
-	2010	1	325
-	2010	1	326
-	2010	1	327
-	2010	1	328
-	2010	1	329
-	2010	1	330
-	2010	1	331
-	2010	1	332
NaN	2010	1	333
+	2010	1	334
+	2010	1	335
+	2010	1	336
+	2010	1	337
+	2010	1	338
+	2010	1	339
+	2010	1	340
+	2010	1	341
NaN	2010	1	342
NaN	2010	1	343
-	2010	1	344
-	2010	1	345
-	2010	1	346
-	2010	1	347
-	2010	1	348
-	2010	1	349
-	2010	1	350
-	2010	1	351
-	2010	1	352
-	2010	1	353
-	2010	1	354
-	2010	1	355
-	2010	1	356
-	2010	1	357
+	2010	1	358
+	2010	1	359
+	2010	1	360
+	2010	1	361
+	2010	1	362
+	2010	1	363
+	2010	1	364
+	2010	1	365
+	2011	1	1
+	2011	1	2
NaN	2011	1	3
NaN	2011	1	4
NaN	2011	1	5
-	2011	1	6
-	2011	1	7
-	2011	1	8
-	2011	1	9
-	2011	1	10
-	2011	1	11
-	2011	1	12
-	2011	1	13
-	2011	1	14
-	2011	1	15
-	2011	1	16
-	2011	1	17
+	2011	1	18
+	2011	1	19
+	2011	1	20
+	2011	1	21
+	2011	1	22
+	2011	1	23
+	2011	1	24
-	2011	1	25
-	2011	1	26
-	2011	1	27
-	2011	1	28
-	2011	1	29
-	2011	1	30
NaN	2011	1	31
-	2011	1	32
-	2011	1	33
-	2011	1	34
-	2011	1	35
-	2011	1	36
-	2011	1	37
-	2011	1	38
-	2011	1	39
-	2011	1	40
-	2011	1	41
-	2011	1	42
-	2011	1	43
-	2011	1	44
-	2011	1	45
+	2011	1	46
+	2011	1	47
+	2011	1	48
+	2011	1	49
+	2011	1	50
-	2011	1	51
-	2011	1	52
-	2011	1	53
-	2011	1	54
-	2011	1	55
NaN	2011	1	56
-	2011	1	57
-	2011	1	58
-	2011	1	59
-	2011	1	60
-	2011	1	61
-	2011	1	62
-	2011	1	63
-	2011	1	64
-	2011	1	65
-	2011	1	66
-	2011	1	67
-	2011	1	68
-	2011	1	69
-	2011	1	70
+	2011	1	71
+	2011	1	72
+	2011	1	73
+	2011	1	74
+	2011	1	75
+	2011	1	76
+	2011	1	77
+	2011	1	78
+	2011	1	79
NaN	2011	1	80
+	2011	1	81
+	2011	1	82
+	2011	1	83
+	2011	1	84
+	2011	1	85
+	2011	1	86
+	2011	1	87
+	2011	1	88
+	2011	1	89
+	2011	1	90
+	2011	1	91
-	2011	1	92
-	2011	1	93
-	2011	1	94
-	2011	1	95
-	2011	1	96
-	2011	1	97
-	2011	1	98
-	2011	1	99
-	2011	1	100
NaN	2011	1	101
+	2011	1	102
+	2011	1	103
+	2011	1	104
+	2011	1	105
+	2011	1	106
+	2011	1	107
+	2011	1	108
+	2011	1	109
+	2011	1	110
+	2011	1	111
+	2011	1	112
+	2011	1	113
+	2011	1	114
+	2011	1	115
+	2011	1	116
+	2011	1	117
+	2011	1	118
-	2011	1	119
-	2011	1	120
-	2011	1	121
-	2011	1	122
-	2011	1	123
-	2011	1	124
-	2011	1	125
-	2011	1	126
-	2011	1	127
-	2011	1	128
-	2011	1	129
-	2011	1	130
+	2011	1	131
+	2011	1	132
+	2011	1	133
+	2011	1	134
+	2011	1	135
+	2011	1	136
+	2011	1	137
+	2011	1	138
+	2011	1	139
+	2011	1	140
+	2011	1	141
+	2011	1	142
+	2011	1	143
+	2011	1	144
+	2011	1	145
+	2011	1	146
-	2011	1	147
-	2011	1	148
-	2011	1	149
-	2011	1	150
-	2011	1	151
-	2011	1	152
-	2011	1	153
-	2011	1	154
-	2011	1	155
-	2011	1	156
-	2011	1	157
-	2011	1	158
-	2011	1	159
-	2011	1	160
-	2011	1	161
-	2011	1	162
+	2011	1	163
+	2011	1	164
+	2011	1	165
+	2011	1	166
+	2011	1	167
+	2011	1	168
+	2011	1	169
+	2011	1	170
+	2011	1	171
+	2011	1	172
-	2011	1	173
-	2011	1	174
-	2011	1	175
-	2011	1	176
-	2011	1	177
-	2011	1	178
-	2011	1	179
-	2011	1	180
-	2011	1	181
-	2011	1	182
-	2011	1	183
-	2011	1	184
-	2011	1	185
-	2011	1	186
-	2011	1	187
-	2011	1	188
-	2011	1	189
+	2011	1	190
+	2011	1	191
+	2011	1	192
+	2011	1	193
+	2011	1	194
+	2011	1	195
+	2011	1	196
+	2011	1	197
+	2011	1	198
-	2011	1	199
-	2011	1	200
-	2011	1	201
-	2011	1	202
-	2011	1	203
-	2011	1	204
-	2011	1	205
-	2011	1	206
-	2011	1	207
-	2011	1	208
-	2011	1	209
-	2011	1	210
-	2011	1	211
-	2011	1	212
-	2011	1	213
-	2011	1	214
-	2011	1	215
-	2011	1	216
-	2011	1	217
-	2011	1	218
+	2011	1	219
+	2011	1	220
+	2011	1	221
+	2011	1	222
+	2011	1	223
+	2011	1	224
+	2011	1	225
-	2011	1	226
-	2011	1	227
-	2011	1	228
-	2011	1	229
-	2011	1	230
-	2011	1	231
-	2011	1	232
-	2011	1	233
-	2011	1	234
-	2011	1	235
-	2011	1	236
-	2011	1	237
-	2011	1	238
-	2011	1	239
-	2011	1	240
-	2011	1	241
-	2011	1	242
-	2011	1	243
-	2011	1	244
-	2011	1	245
+	2011	1	246
+	2011	1	247
+	2011	1	248
+	2011	1	249
+	2011	1	250
+	2011	1	251
+	2011	1	252
-	2011	1	253
-	2011	1	254
-	2011	1	255
-	2011	1	256
-	2011	1	257
-	2011	1	258
-	2011	1	259
-	2011	1	260
-	2011	1	261
-	2011	1	262
-	2011	1	263
-	2011	1	264
-	2011	1	265
-	2011	1	266
-	2011	1	267
-	2011	1	268
-	2011	1	269
+	2011	1	270
+	2011	1	271
+	2011	1	272
+	2011	1	273
+	2011	1	274
+	2011	1	275
+	2011	1	276
+	2011	1	277
+	2011	1	278
+	2011	1	279
+	2011	1	280
-	2011	1	281
-	2011	1	282
-	2011	1	283
-	2011	1	284
-	2011	1	285
-	2011	1	286
-	2011	1	287
-	2011	1	288
-	2011	1	289
-	2011	1	290
-	2011	1	291
-	2011	1	292
-	2011	1	293
-	2011	1	294
-	2011	1	295
-	2011	1	296
-	2011	1	297
-	2011	1	298
-	2011	1	299
-	2011	1	300
-	2011	1	301
-	2011	1	302
+	2011	1	303
+	2011	1	304
+	2011	1	305
+	2011	1	306
+	2011	1	307
+	2011	1	308
+	2011	1	309
+	2011	1	310
-	2011	1	311
-	2011	1	312
-	2011	1	313
-	2011	1	314
-	2011	1	315
-	2011	1	316
-	2011	1	317
-	2011	1	318
-	2011	1	319
-	2011	1	320
-	2011	1	321
-	2011	1	322
-	2011	1	323
-	2011	1	324
-	2011	1	325
-	2011	1	326
-	2011	1	327
-	2011	1	328
-	2011	1	329
-	2011	1	330
-	2011	1	331
-	2011	1	332
-	2011	1	333
NaN	2011	1	334
+	2011	1	335
+	2011	1	336
+	2011	1	337
+	2011	1	338
+	2011	1	339
+	2011	1	340
+	2011	1	341
NaN	2011	1	342
-	2011	1	343
-	2011	1	344
-	2011	1	345
-	2011	1	346
-	2011	1	347
-	2011	1	348
-	2011	1	349
-	2011	1	350
-	2011	1	351
-	2011	1	352
-	2011	1	353
-	2011	1	354
-	2011	1	355
-	2011	1	356
-	2011	1	357
-	2011	1	358
-	2011	1	359
-	2011	1	360
-	2011	1	361
+	2011	1	362
+	2011	1	363
NaN	2011	1	364
+	2011	1	365
+	2012	1	1
+	2012	1	2
+	2012	1	3
+	2012	1	4
+	2012	1	5
-	2012	1	6
-	2012	1	7
-	2012	1	8
-	2012	1	9
-	2012	1	10
-	2012	1	11
-	2012	1	12
-	2012	1	13
NaN	2012	1	14
-	2012	1	15
-	2012	1	16
-	2012	1	17
-	2012	1	18
-	2012	1	19
-	2012	1	20
-	2012	1	21
-	2012	1	22
-	2012	1	23
-	2012	1	24
+	2012	1	25
+	2012	1	26
+	2012	1	27
+	2012	1	28
+	2012	1	29
+	2012	1	30
+	2012	1	31
+	2012	1	32
-	2012	1	33
-	2012	1	34
-	2012	1	35
-	2012	1	36
-	2012	1	37
-	2012	1	38
-	2012	1	39
-	2012	1	40
-	2012	1	41
-	2012	1	42
-	2012	1	43
-	2012	1	44
-	2012	1	45
-	2012	1	46
-	2012	1	47
-	2012	1	48
-	2012	1	49
-	2012	1	50
-	2012	1	51
-	2012	1	52
+	2012	1	53
+	2012	1	54
+	2012	1	55
+	2012	1	56
+	2012	1	57
+	2012	1	58
+	2012	1	59
+	2012	1	60
-	2012	1	61
-	2012	1	62
-	2012	1	63
-	2012	1	64
-	2012	1	65
-	2012	1	66
+	2012	1	67
+	2012	1	68
+	2012	1	69
+	2012	1	70
+	2012	1	71
+	2012	1	72
-	2012	1	73
-	2012	1	74
-	2012	1	75
-	2012	1	76
-	2012	1	77
-	2012	1	78
-	2012	1	79
-	2012	1	80
-	2012	1	81
-	2012	1	82
+	2012	1	83
+	2012	1	84
+	2012	1	85
+	2012	1	86
-	2012	1	87
-	2012	1	88
-	2012	1	89
-	2012	1	90
-	2012	1	91
-	2012	1	92
-	2012	1	93
-	2012	1	94
-	2012	1	95
+	2012	1	96
+	2012	1	97
+	2012	1	98
+	2012	1	99
+	2012	1	100
-	2012	1	101
-	2012	1	102
-	2012	1	103
-	2012	1	104
-	2012	1	105
-	2012	1	106
-	2012	1	107
-	2012	1	108
-	2012	1	109
-	2012	1	110
-	2012	1	111
NaN	2012	1	112
NaN	2012	1	113
-	2012	1	114
-	2012	1	115
-	2012	1	116
-	2012	1	117
-	2012	1	118
-	2012	1	119
-	2012	1	120
-	2012	1	121
-	2012	1	122
-	2012	1	123
+	2012	1	124
+	2012	1	125
+	2012	1	126
+	2012	1	127
+	2012	1	128
NaN	2012	1	129
-	2012	1	130
-	2012	1	131
-	2012	1	132
-	2012	1	133
-	2012	1	134
-	2012	1	135
-	2012	1	136
-	2012	1	137
-	2012	1	138
-	2012	1	139
NaN	2012	1	140
NaN	2012	1	141
-	2012	1	142
-	2012	1	143
-	2012	1	144
-	2012	1	145
-	2012	1	146
-	2012	1	147
-	2012	1	148
-	2012	1	149
+	2012	1	150
+	2012	1	151
+	2012	1	152
+	2012	1	153
+	2012	1	154
-	2012	1	155
-	2012	1	156
-	2012	1	157
-	2012	1	158
-	2012	1	159
-	2012	1	160
-	2012	1	161
-	2012	1	162
-	2012	1	163
+	2012	1	164
+	2012	1	165
+	2012	1	166
+	2012	1	167
+	2012	1	168
+	2012	1	169
-	2012	1	170
-	2012	1	171
-	2012	1	172
-	2012	1	173
-	2012	1	174
-	2012	1	175
+	2012	1	176
+	2012	1	177
+	2012	1	178
+	2012	1	179
+	2012	1	180
+	2012	1	181
NaN	2012	1	182
-	2012	1	183
-	2012	1	184
-	2012	1	185
-	2012	1	186
-	2012	1	187
-	2012	1	188
-	2012	1	189
-	2012	1	190
-	2012	1	191
+	2012	1	192
+	2012	1	193
+	2012	1	194
+	2012	1	195
-	2012	1	196
-	2012	1	197
-	2012	1	198
-	2012	1	199
-	2012	1	200
-	2012	1	201
-	2012	1	202
-	2012	1	203
-	2012	1	204
+	2012	1	205
+	2012	1	206
+	2012	1	207
+	2012	1	208
+	2012	1	209
+	2012	1	210
-	2012	1	211
-	2012	1	212
-	2012	1	213
-	2012	1	214
-	2012	1	215
-	2012	1	216
-	2012	1	217
-	2012	1	218
+	2012	1	219
+	2012	1	220
+	2012	1	221
+	2012	1	222
+	2012	1	223
+	2012	1	224
-	2012	1	225
-	2012	1	226
-	2012	1	227
-	2012	1	228
-	2012	1	229
-	2012	1	230
-	2012	1	231
+	2012	1	232
+	2012	1	233
+	2012	1	234
+	2012	1	235
+	2012	1	236
+	2012	1	237
-	2012	1	238
-	2012	1	239
-	2012	1	240
-	2012	1	241
-	2012	1	242
-	2012	1	243
-	2012	1	244
NaN	2012	1	245
+	2012	1	246
+	2012	1	247
+	2012	1	248
+	2012	1	249
NaN	2012	1	250
+	2012	1	251
+	2012	1	252
+	2012	1	253
-	2012	1	254
-	2012	1	255
NaN	2012	1	256
-	2012	1	257
-	2012	1	258
-	2012	1	259
-	2012	1	260
NaN	2012	1	261
NaN	2012	1	262
NaN	2012	1	263
-	2012	1	264
-	2012	1	265
-	2012	1	266
-	2012	1	267
-	2012	1	268
-	2012	1	269
-	2012	1	270
-	2012	1	271
-	2012	1	272
+	2012	1	273
+	2012	1	274
+	2012	1	275
NaN	2012	1	276
NaN	2012	1	277
+	2012	1	278
+	2012	1	279
+	2012	1	280
+	2012	1	281
-	2012	1	282
-	2012	1	283
-	2012	1	284
-	2012	1	285
-	2012	1	286
+	2012	1	287
+	2012	1	288
+	2012	1	289
+	2012	1	290
-	2012	1	291
-	2012	1	292
-	2012	1	293
-	2012	1	294
-	2012	1	295
-	2012	1	296
+	2012	1	297
+	2012	1	298
+	2012	1	299
+	2012	1	300
+	2012	1	301
+	2012	1	302
+	2012	1	303
+	2012	1	304
-	2012	1	305
-	2012	1	306
-	2012	1	307
-	2012	1	308
-	2012	1	309
NaN	2012	1	310
NaN	2012	1	311
-	2012	1	312
-	2012	1	313
-	2012	1	314
-	2012	1	315
-	2012	1	316
-	2012	1	317
-	2012	1	318
-	2012	1	319
-	2012	1	320
-	2012	1	321
NaN	2012	1	322
+	2012	1	323
+	2012	1	324
+	2012	1	325
+	2012	1	326
+	2012	1	327
+	2012	1	328
NaN	2012	1	329
-	2012	1	330
-	2012	1	331
-	2012	1	332
-	2012	1	333
-	2012	1	334
-	2012	1	335
-	2012	1	336
-	2012	1	337
-	2012	1	338
-	2012	1	339
-	2012	1	340
-	2012	1	341
-	2012	1	342
-	2012	1	343
-	2012	1	344
-	2012	1	345
NaN	2012	1	346
NaN	2012	1	347
+	2012	1	348
+	2012	1	349
+	2012	1	350
+	2012	1	351
+	2012	1	352
+	2012	1	353
+	2012	1	354
+	2012	1	355
+	2012	1	356
+	2012	1	357
+	2012	1	358
-	2012	1	359
-	2012	1	360
-	2012	1	361
-	2012	1	362
-	2012	1	363
-	2012	1	364
-	2012	1	365
-	2012	1	366
-	2013	1	1
-	2013	1	2
-	2013	1	3
+	2013	1	4
+	2013	1	5
-	2013	1	6
-	2013	1	7
-	2013	1	8
-	2013	1	9
-	2013	1	10
+	2013	1	11
+	2013	1	12
+	2013	1	13
+	2013	1	14
+	2013	1	15
+	2013	1	16
+	2013	1	17
-	2013	1	18
NaN	2013	1	19
-	2013	1	20
-	2013	1	21
-	2013	1	22
-	2013	1	23
NaN	2013	1	24
-	2013	1	25
-	2013	1	26
-	2013	1	27
-	2013	1	28
-	2013	1	29
-	2013	1	30
-	2013	1	31
-	2013	1	32
-	2013	1	33
-	2013	1	34
-	2013	1	35
-	2013	1	36
+	2013	1	37
+	2013	1	38
+	2013	1	39
+	2013	1	40
+	2013	1	41
+	2013	1	42
+	2013	1	43
+	2013	1	44
+	2013	1	45
+	2013	1	46
+	2013	1	47
+	2013	1	48
+	2013	1	49
+	2013	1	50
-	2013	1	51
-	2013	1	52
-	2013	1	53
-	2013	1	54
-	2013	1	55
-	2013	1	56
-	2013	1	57
-	2013	1	58
-	2013	1	59
-	2013	1	60
-	2013	1	61
-	2013	1	62
-	2013	1	63
-	2013	1	64
+	2013	1	65
+	2013	1	66
+	2013	1	67
+	2013	1	68
+	2013	1	69
+	2013	1	70
+	2013	1	71
+	2013	1	72
+	2013	1	73
+	2013	1	74
+	2013	1	75
NaN	2013	1	76
-	2013	1	77
-	2013	1	78
-	2013	1	79
-	2013	1	80
-	2013	1	81
-	2013	1	82
-	2013	1	83
NaN	2013	1	84
NaN	2013	1	85
-	2013	1	86
-	2013	1	87
-	2013	1	88
-	2013	1	89
-	2013	1	90
-	2013	1	91
-	2013	1	92
-	2013	1	93
-	2013	1	94
-	2013	1	95
-	2013	1	96
-	2013	1	97
+	2013	1	98
+	2013	1	99
+	2013	1	100
+	2013	1	101
+	2013	1	102
+	2013	1	103
+	2013	1	104
+	2013	1	105
+	2013	1	106
+	2013	1	107
+	2013	1	108
+	2013	1	109
+	2013	1	110
+	2013	1	111
+	2013	1	112
+	2013	1	113
-	2013	1	114
-	2013	1	115
-	2013	1	116
-	2013	1	117
-	2013	1	118
-	2013	1	119
-	2013	1	120
-	2013	1	121
-	2013	1	122
-	2013	1	123
-	2013	1	124
-	2013	1	125
+	2013	1	126
+	2013	1	127
+	2013	1	128
+	2013	1	129
+	2013	1	130
+	2013	1	131
+	2013	1	132
+	2013	1	133
+	2013	1	134
+	2013	1	135
+	2013	1	136
NaN	2013	1	137
-	2013	1	138
-	2013	1	139
-	2013	1	140
-	2013	1	141
-	2013	1	142
-	2013	1	143
-	2013	1	144
-	2013	1	145
-	2013	1	146
-	2013	1	147
-	2013	1	148
-	2013	1	149
-	2013	1	150
-	2013	1	151
+	2013	1	152
+	2013	1	153
+	2013	1	154
+	2013	1	155
+	2013	1	156
+	2013	1	157
+	2013	1	158
+	2013	1	159
+	2013	1	160
+	2013	1	161
+	2013	1	162
+	2013	1	163
+	2013	1	164
+	2013	1	165
-	2013	1	166
-	2013	1	167
-	2013	1	168
-	2013	1	169
-	2013	1	170
-	2013	1	171
-	2013	1	172
-	2013	1	173
-	2013	1	174
-	2013	1	175
-	2013	1	176
-	2013	1	177
-	2013	1	178
-	2013	1	179
NaN	2013	1	180
+	2013	1	181
+	2013	1	182
+	2013	1	183
+	2013	1	184
+	2013	1	185
+	2013	1	186
+	2013	1	187
NaN	2013	1	188
+	2013	1	189
+	2013	1	190
+	2013	1	191
NaN	2013	1	192
+	2013	1	193
NaN	2013	1	194
NaN	2013	1	195
+	2013	1	196
+	2013	1	197
-	2013	1	198
-	2013	1	199
-	2013	1	200
-	2013	1	201
-	2013	1	202
-	2013	1	203
-	2013	1	204
-	2013	1	205
+	2013	1	206
+	2013	1	207
+	2013	1	208
+	2013	1	209
+	2013	1	210
+	2013	1	211
+	2013	1	212
+	2013	1	213
+	2013	1	214
NaN	2013	1	215
+	2013	1	216
+	2013	1	217
+	2013	1	218
+	2013	1	219
+	2013	1	220
-	2013	1	221
-	2013	1	222
-	2013	1	223
-	2013	1	224
-	2013	1	225
-	2013	1	226
-	2013	1	227
-	2013	1	228
-	2013	1	229
-	2013	1	230
-	2013	1	231
-	2013	1	232
+	2013	1	233
+	2013	1	234
+	2013	1	235
+	2013	1	236
+	2013	1	237
+	2013	1	238
+	2013	1	239
+	2013	1	240
NaN	2013	1	241
+	2013	1	242
+	2013	1	243
+	2013	1	244
+	2013	1	245
-	2013	1	246
-	2013	1	247
-	2013	1	248
-	2013	1	249
-	2013	1	250
NaN	2013	1	251
NaN	2013	1	252
-	2013	1	253
-	2013	1	254
-	2013	1	255
-	2013	1	256
-	2013	1	257
-	2013	1	258
-	2013	1	259
-	2013	1	260
+	2013	1	261
+	2013	1	262
+	2013	1	263
+	2013	1	264
+	2013	1	265
+	2013	1	266
+	2013	1	267
-	2013	1	268
+	2013	1	269
+	2013	1	270
+	2013	1	271
+	2013	1	272
-	2013	1	273
-	2013	1	274
-	2013	1	275
-	2013	1	276
-	2013	1	277
-	2013	1	278
NaN	2013	1	279
+	2013	1	280
+	2013	1	281
+	2013	1	282
+	2013	1	283
+	2013	1	284
+	2013	1	285
NaN	2013	1	286
+	2013	1	287
+	2013	1	288
+	2013	1	289
+	2013	1	290
+	2013	1	291
+	2013	1	292
+	2013	1	293
-	2013	1	294
-	2013	1	295
-	2013	1	296
-	2013	1	297
-	2013	1	298
-	2013	1	299
-	2013	1	300
-	2013	1	301
-	2013	1	302
-	2013	1	303
-	2013	1	304
-	2013	1	305
-	2013	1	306
NaN	2013	1	307
+	2013	1	308
+	2013	1	309
+	2013	1	310
+	2013	1	311
NaN	2013	1	312
+	2013	1	313
+	2013	1	314
+	2013	1	315
+	2013	1	316
+	2013	1	317
-	2013	1	318
-	2013	1	319
-	2013	1	320
-	2013	1	321
-	2013	1	322
-	2013	1	323
-	2013	1	324
-	2013	1	325
-	2013	1	326
-	2013	1	327
-	2013	1	328
-	2013	1	329
-	2013	1	330
+	2013	1	331
+	2013	1	332
+	2013	1	333
+	2013	1	334
+	2013	1	335
+	2013	1	336
+	2013	1	337
+	2013	1	338
+	2013	1	339
+	2013	1	340
+	2013	1	341
+	2013	1	342
+	2013	1	343
+	2013	1	344
+	2013	1	345
+	2013	1	346
+	2013	1	347
-	2013	1	348
-	2013	1	349
-	2013	1	350
-	2013	1	351
-	2013	1	352
-	2013	1	353
-	2013	1	354
-	2013	1	355
-	2013	1	356
+	2013	1	357
+	2013	1	358
+	2013	1	359
+	2013	1	360
+	2013	1	361
+	2013	1	362
+	2013	1	363
+	2013	1	364
+	2013	1	365
+	2014	1	1
+	2014	1	2
+	2014	1	3
+	2014	1	4
+	2014	1	5
+	2014	1	6
+	2014	1	7
+	2014	1	8
+	2014	1	9
+	2014	1	10
-	2014	1	11
-	2014	1	12
-	2014	1	13
-	2014	1	14
-	2014	1	15
-	2014	1	16
-	2014	1	17
-	2014	1	18
NaN	2014	1	19
+	2014	1	20
+	2014	1	21
+	2014	1	22
+	2014	1	23
+	2014	1	24
+	2014	1	25
+	2014	1	26
+	2014	1	27
+	2014	1	28
+	2014	1	29
+	2014	1	30
+	2014	1	31
+	2014	1	32
NaN	2014	1	33
NaN	2014	1	34
+	2014	1	35
+	2014	1	36
+	2014	1	37
+	2014	1	38
-	2014	1	39
-	2014	1	40
-	2014	1	41
-	2014	1	42
-	2014	1	43
-	2014	1	44
-	2014	1	45
NaN	2014	1	46
-	2014	1	47
-	2014	1	48
-	2014	1	49
NaN	2014	1	50
NaN	2014	1	51
-	2014	1	52
-	2014	1	53
+	2014	1	54
+	2014	1	55
+	2014	1	56
+	2014	1	57
+	2014	1	58
-	2014	1	59
-	2014	1	60
-	2014	1	61
-	2014	1	62
NaN	2014	1	63
+	2014	1	64
+	2014	1	65
+	2014	1	66
+	2014	1	67
+	2014	1	68
+	2014	1	69
NaN	2014	1	70
NaN	2014	1	71
+	2014	1	72
+	2014	1	73
+	2014	1	74
+	2014	1	75
+	2014	1	76
-	2014	1	77
-	2014	1	78
-	2014	1	79
-	2014	1	80
-	2014	1	81
NaN	2014	1	82
NaN	2014	1	83
-	2014	1	84
-	2014	1	85
-	2014	1	86
-	2014	1	87
-	2014	1	88
-	2014	1	89
+	2014	1	90
+	2014	1	91
+	2014	1	92
+	2014	1	93
+	2014	1	94
+	2014	1	95
+	2014	1	96
+	2014	1	97
+	2014	1	98
+	2014	1	99
+	2014	1	100
+	2014	1	101
-	2014	1	102
-	2014	1	103
-	2014	1	104
-	2014	1	105
-	2014	1	106
NaN	2014	1	107
NaN	2014	1	108
NaN	2014	1	109
-	2014	1	110
-	2014	1	111
-	2014	1	112
-	2014	1	113
-	2014	1	114
-	2014	1	115
-	2014	1	116
-	2014	1	117
-	2014	1	118
-	2014	1	119
+	2014	1	120
+	2014	1	121
+	2014	1	122
+	2014	1	123
NaN	2014	1	124
NaN	2014	1	125
NaN	2014	1	126
NaN	2014	1	127
-	2014	1	128
-	2014	1	129
-	2014	1	130
-	2014	1	131
-	2014	1	132
-	2014	1	133
+	2014	1	134
+	2014	1	135
+	2014	1	136
+	2014	1	137
+	2014	1	138
+	2014	1	139
+	2014	1	140
+	2014	1	141
-	2014	1	142
-	2014	1	143
-	2014	1	144
-	2014	1	145
-	2014	1	146
-	2014	1	147
+	2014	1	148
+	2014	1	149
+	2014	1	150
+	2014	1	151
+	2014	1	152
+	2014	1	153
+	2014	1	154
-	2014	1	155
-	2014	1	156
-	2014	1	157
-	2014	1	158
-	2014	1	159
-	2014	1	160
+	2014	1	161
+	2014	1	162
+	2014	1	163
+	2014	1	164
+	2014	1	165
+	2014	1	166
+	2014	1	167
-	2014	1	168
-	2014	1	169
-	2014	1	170
-	2014	1	171
-	2014	1	172
-	2014	1	173
-	2014	1	174
[truncated: 922 more rows]
